# Supplementary material for: Different CFTR modulator combinations downregulate inflammation differently in cystic fibrosis
Source: eLife. 2020 Mar 2;9:e54556. doi: 10.7554/eLife.54556 (PMC7062465; doi:10.7554/eLife.54556)
Supplement: Figure 1—source data 1. — ELISA assays were used to detect IL-18 or IL-1β secretion (n = 10 IVA/LUM; n = 4 IVA/TEZ) vs HC (n = 4). [file elife-54556-fig1-data1.xlsx]

## Sheet: IL-18 IVALUM
In Vitro Monocytes - IVA/LUM		IL-18
	Treatment	HC (pg/ml)
		HC4	HC2	HC20	HC17
	Unstimulated	81.1751	198.495	154.017	8.036
	LPS/ATP	255.435	269.321	383.397	158.075
	IVA/LUM	72.7622	186.487	128.506	8.3847
	IVA/LUM + LPS/ATP	135.298	381.625	307.681	113.31
	Treatment	CF (pg/ml)
		CF37	CF19	CF16	CF84	CF85	CF86	CF26	CF10	CF11	CF48
	Unstimulated	130.203	9.20311	69.4003	49.2663	70.3097	61.4004	0	57.3538	148.11	104.986
	LPS/ATP	463.717	250.235	440.397	1089.92	879.304	1252.7	865.929	677.436	860.449	997.977
	IVA/LUM	116.638	22.5288	128.506	49.2663	35.5351	110.11	30.6941	0	157.518	72.6537
	IVA/LUM + LPS/ATP	451.149	215.692	383.397	615.833	544.392	623.617	380.589	381.429	527.83	561.635

## Sheet: IL-1β IVALUM
In Vitro Monocytes - IVA/LUM		IL-1β
	Treatment	HC (pg/ml)
		HC4	HC2	HC20	HC17
	Unstimulated	45.8872	54.3734	51.9051	4.87029
	LPS/ATP	109.936	170.157	163.971	94.1696
	IVA/LUM	49.7142	51.0832	47.5263	2.36306
	IVA/LUM + LPS/ATP	109.936	103.415	165.442	57.7847
	Treatment	CF (pg/ml)
		CF37	CF19	CF16	CF84	CF85	CF86	CF26	CF10	CF11	CF48
	Unstimulated	61.8009	27.9655	53.2759	7.83033	3.96447	5.89525	96.1476	8.31477	61.2819	67.8674
	LPS/ATP	915.891	650.324	660.302	529.803	255.933	681.2	341.008	396.382	743.705	668.068
	IVA/LUM	57.6703	39.0755	56.2958	12.9305	5.17071	10.4981	77.8718	12.4435	50.4233	66.1739
	IVA/LUM + LPS/ATP	763.83	328.255	647.015	401.909	210.606	573.05	343.094	378.177	904.312	618.696

## Sheet: IL-18 IVATEZ
In Vitro Monocytes - IVA/TEZ		IL-18
	Treatment	HC (pg/ml)
		HC4	HC2	HC20	HC17
	Unstimulated	8.036	14.8829	12.4135	8.036
	LPS/ATP	233.346	111.158	84.1704	158.075
	IVA/TEZ	8.73367	15.9451	10.4824	11.7104
	IVA/TEZ + LPS/ATP	137.361	113.094	32.1708	71.2949
	Treatment	CF (pg/ml)
		CF37	CF19	CF16	CF84
	Unstimulated	1.45954	6.99144	0	8.036
	LPS/ATP	456.767	1042.41	954.012	732.814
	IVA/TEZ	0.772649	8.90825	4.90929	11.7104
	IVA/TEZ + LPS/ATP	244.726	198.978	207.377	319.231

## Sheet: IL-1β IVATEZ
In Vitro Monocytes - IVA/TEZ		IL-1β
	Treatment	HC (pg/ml)
		HC4	HC2	HC20	HC17
	Unstimulated	7.54459	5.51889	5.71393	4.87029
	LPS/ATP	135.522	74.4689	118.103	94.1696
	IVA/TEZ	9.195	6.03947	5.06462	0.774288
	IVA/TEZ + LPS/ATP	20.7612	103.132	65.1645	79.7028
	Treatment	CF (pg/ml)
		CF37	CF19	CF16	CF84
	Unstimulated	1.72584	0.395099	9.195	2.49078
	LPS/ATP	557.157	530.473	417.619	459.658
	IVA/TEZ	8.00519	6.75774	6.69232	0
	IVA/TEZ + LPS/ATP	252.68	208.145	459.658	163.373
