# Supplementary material for: Different CFTR modulator combinations downregulate inflammation differently in cystic fibrosis
Source: eLife. 2020 Mar 2;9:e54556. doi: 10.7554/eLife.54556 (PMC7062465; doi:10.7554/eLife.54556)
Supplement: Figure 2—source data 1. — The baseline (pre-therapy, zero month) values for each patient were calculated as a percentage of the average baseline within each patient group (IVA/LUM or IVA/TEZ). The one month and three month samples were calculated as a percentage of the baseline average. ELISA assays were used to detect IL-18, IL-1β, TNF or IL-6 secretion (n = 13 IVA/LUM; n = 8 IVA/TEZ). [file elife-54556-fig2-data1.xlsx]

## Sheet: IL-18 IVA LUM
Serum - IVA/LUM
IL-18		Months on IVA/LUM (pg/ml)					Months on IVA/LUM (pg/ml)
	CF Patient Number	0	1	3		CF Patient Number	0	1	3
	CF26	371.255	231.075	189.552		CF26	90.367	56.2458	46.1387
	CF30	460.632	348.275	235.01		CF30	112.122	84.7735	57.2036
	CF31	824.672	485.61	208.914		CF31	200.733	118.202	50.8516
	CF34	648.366	357.298	129.385		CF34	157.818	86.9698	31.4936
	CF36	234.353	186.342	130.01		CF36	57.0439	45.3574	31.6456
	CF39	259.439	264.759	282.811		CF39	63.15	64.4448	68.8389
	CF40	214.757	205.027	172.914		CF40	52.274	49.9056	42.0888
	CF51	162.105	147.57	99.6267		CF51	39.458	35.92	24.2501
	CF80	365.058	237.994	144.285		CF80	88.8587	57.9301	35.1203
	CF82	447.829	382.207	163.574		CF82	109.006	93.0327	39.8155
	CF85	499.577	277.8	152.544		CF85	121.602	67.6192	37.1307
	CF10	459.45	221.749	242.488		CF10	111.835	53.9759	59.0239
	CF102	393.298	317.248	149.455		CF102	95.7326	77.2212	36.3788
	Average	410.83	281.766	176.967		Average	100	68.5845	43.0754
						Zero months set to 100. Each patient calculated relative to the group average.

## Sheet: IL-18 IVA TEZ
Serum - IVA/TEZ
IL-18		Months on IVA/LUM (pg/ml)					Months on IVA/LUM (pg/ml)
	CF Patient Number	0	1	3		CF Patient Number	0	1	3
	CF34	290.188	196.784	139.884		CF26	91.6907	62.1779	44.1993
	CF53	272.178	173.518	144.285		CF30	86.0001	54.8266	45.5897
	CF100	355.363	324.67	269.368		CF31	112.284	102.586	85.1124
	CF38	330.909	181.264	96.5977		CF34	104.558	57.2739	30.522
	CF23	382.132	292.15	198.267		CF36	120.742	92.3106	62.6466
	CF86	286.565	236.038	150.654		CF39	90.5459	74.581	47.6023
	CF33	229.113	189.086	97.0188		CF40	72.393	59.7455	30.6551
	CF64	385.435	302.401	120.15		CF51	121.786	95.5497	37.9639
	Average	316.485	236.989	152.028		Average	100	74.8814	48.0364
						Zero months set to 100. Each patient calculated relative to the group average.

## Sheet: IL-1β IVA LUM
Serum - IVA/LUM
IL-1β		Months on IVA/LUM (pg/ml)					Months on IVA/LUM (pg/ml)
	CF Patient Number	0	1	3		CF Patient Number	0	1	3
	CF26	37.8805	34.6156	33.2618		CF26	101.909	93.1256	89.4835
	CF30	37.8805	36.2453	37.0622		CF30	101.909	97.5099	99.7076
	CF31	40.0695	35.1582	31.1037		CF31	107.798	94.5854	83.6774
	CF34	48.3674	32.9915	27.0833		CF34	130.122	88.7563	72.8615
	CF36	47.8098	33.2618	30.2969		CF36	128.621	89.4835	81.5069
	CF39	40.8929	45.3083	41.993		CF39	110.013	121.892	112.973
	CF40	40.3438	44.4774	46.4185		CF40	108.536	119.656	124.879
	CF51	38.1536	30.8346	27.3503		CF51	102.644	82.9535	73.5798
	CF80	20.6343	16.2693	30.0461		CF80	55.512	43.7689	80.8323
	CF82	34.754	40.3522	25.1992		CF82	93.4978	108.559	67.7929
	CF85	50.1174	40.3807	34.8327		CF85	134.83	108.635	93.7096
	CF10	18.9688	22.078	25.7113		CF10	51.0313	59.3959	69.1704
	CF102	27.3493	21.5791	20.3342		CF102	73.5773	58.0537	54.7047
	Average	37.1709	33.3502	31.5918		Average	100	89.7211	84.9906
						Zero months set to 100. Each patient calculated relative to the group average.

## Sheet: IL-1β IVA TEZ
Serum - IVA/TEZ
IL-1β		Months on IVA/LUM (pg/ml)					Months on IVA/LUM (pg/ml)
	CF Patient Number	0	1	3		CF Patient Number	0	1	3
	CF34	27.8995	28.4639	18.7247		CF26	90.5923	92.425	60.8009
	CF53	39.2494	31.2365	24.8905		CF30	127.446	101.428	80.8218
	CF100	24.8905	23.5051	17.8485		CF31	80.8218	76.3231	57.9558
	CF38	34.1169	34.1169	25.5866		CF34	110.781	110.781	83.082
	CF23	35.4356	25.7427	11.9226		CF36	115.063	83.589	38.7137
	CF86	31.6162	29.089	24.2871		CF39	102.661	94.4546	78.8624
	CF33	24.2871	19.6421	15.6577		CF40	78.8624	63.7796	50.8419
	CF64	28.8791	24.7025	22.3196		CF51	93.773	80.2112	72.4737
	Average	30.7968	27.0623	20.1547		Average	100	87.8739	65.444
						Zero months set to 100. Each patient calculated relative to the group average.

## Sheet: TNF IVA LUM
Serum - IVA/LUM
TNF		Months on IVA/LUM (pg/ml)					Months on IVA/LUM (pg/ml)
	CF Patient Number	0	1	3		CF Patient Number	0	1	3
	CF26	176.834	123.284	79.209		CF26	120.332	83.8924	53.9003
	CF30	204.44	147.825	60.63		CF30	139.118	100.593	41.2576
	CF31	326.268	186.915	97.2779		CF31	222.019	127.193	66.1959
	CF34	154.525	145.861	42.2895		CF34	105.151	99.2561	28.7772
	CF36	155.315	109.455	114.433		CF36	105.689	74.4822	77.8695
	CF39	47.4013	53.633	63.9563		CF39	32.2557	36.4963	43.5212
	CF40	119.813	104.876	43.3833		CF40	81.531	71.3663	29.5216
	CF51	166.828	121.74	117.12		CF51	113.524	82.8421	79.6984
	CF80	91.2073	70.3685	22.9748		CF80	62.065	47.8845	15.6339
	CF82	165.014	139.684	66.8061		CF82	112.289	95.0525	45.4603
	CF85	113.491	67.265	20.785		CF85	77.2285	45.7726	14.1438
	CF10	68.562	52.0823	32.3944		CF10	46.6552	35.4411	22.0438
	CF102	120.711	47.2898	38.0702		CF102	82.1419	32.1799	25.9061
	Average	146.955	105.406	61.4869		Average	100	71.727	41.8408
						Zero months set to 100. Each patient calculated relative to the group average.

## Sheet: TNF IVA TEZ
Serum - IVA/TEZ
TNF		Months on IVA/LUM (pg/ml)					Months on IVA/LUM (pg/ml)
	CF Patient Number	0	1	3		CF Patient Number	0	1	3
	CF34	113.974	90.9719	22.0983		CF26	44.0241	35.1394	8.53582
	CF53	102.46	68.9879	22.4269		CF30	39.5769	26.6477	8.66275
	CF100	203.602	165.782	139.808		CF31	78.6445	64.036	54.0032
	CF38	127.471	113.611	47.0544		CF34	49.2378	43.8843	18.1755
	CF23	533.349	309.603	152.825		CF36	206.015	119.589	59.0313
	CF86	388.326	244.633	203.085		CF39	149.997	94.4934	78.445
	CF33	191.567	178.607	72.2437		CF40	73.996	68.9899	27.9053
	CF64	410.361	158.334	118.125		CF51	158.509	61.1593	45.6278
	Average	258.889	166.316	97.2084		Average	100	64.2424	37.5483
						Zero months set to 100. Each patient calculated relative to the group average.

## Sheet: IL-6 IVA LUM
Serum - IVA/LUM
IL-6		Months on IVA/LUM (pg/ml)					Months on IVA/LUM (pg/ml)
	CF Patient Number	0	1	3		CF Patient Number	0	1	3
	CF26	71.257	53.3433	34.489		CF26	88.7195	66.4158	42.941
	CF30	93.3371	54.91	22.7989		CF30	116.211	68.3665	28.386
	CF31	58.0515	21.2846	25.5813		CF31	72.2777	26.5007	31.8503
	CF34	67.8053	77.9319	47.8805		CF34	84.4219	97.0302	59.6142
	CF36	78.468	70.4593	37.0495		CF36	97.6977	87.7263	46.129
	CF39	124.688	136.348	137.78		CF39	155.245	169.761	171.545
	CF40	119.619	114.02	94.4282		CF40	148.933	141.963	117.569
	CF51	116.815	72.0555	73.3877		CF51	145.442	89.7136	91.3723
	CF80	17.2831	33.6096	17.5447		CF80	21.5185	41.8461	21.8442
	CF82	49.2544	40.5257	29.3107		CF82	61.3248	50.457	36.4936
	CF85	55.3446	64.5597	63.0524		CF85	68.9075	80.3809	78.5041
	CF10	87.405	82.9785	41.5657		CF10	108.825	103.313	51.7519
	CF102	104.795	78.5676	100.071		CF102	130.477	97.8216	124.595
	Average	80.3172	69.2765	55.7646		Average	100	86.2535	69.4305
						Zero months set to 100. Each patient calculated relative to the group average.

## Sheet: IL-6 IVA TEZ
Serum - IVA/TEZ
IL-6		Months on IVA/LUM (pg/ml)					Months on IVA/LUM (pg/ml)
	CF Patient Number	0	1	3		CF Patient Number	0	1	3
	CF34	29.1997	23.2544	25.8825		CF26	31.8736	25.384	28.2526
	CF53	77.3269	91.0811	69.7978		CF30	84.4081	99.4218	76.1895
	CF100	56.5894	43.9725	42.4817		CF31	61.7715	47.9993	46.372
	CF38	100.107	105.342	74.7323		CF34	109.274	114.989	81.5759
	CF23	122.87	102.364	99.0482		CF36	134.121	111.738	108.118
	CF86	74.4775	96.1933	74.7912		CF39	81.2977	105.002	81.6402
	CF33	150.488	119.41	78.1506		CF40	164.268	130.345	85.3072
	CF64	121.829	124.377	76.9931		CF51	132.986	135.766	84.0437
	Average	91.6108	88.2492	67.7347		Average	100	96.3306	73.9375
						Zero months set to 100. Each patient calculated relative to the group average.
