# Supplementary material for: Different CFTR modulator combinations downregulate inflammation differently in cystic fibrosis
Source: eLife. 2020 Mar 2;9:e54556. doi: 10.7554/eLife.54556 (PMC7062465; doi:10.7554/eLife.54556)
Supplement: Figure 3—source data 1. — The baseline (pre-therapy, zero month) values for each patient were calculated as a percentage of the average baseline within each patient group (IVA/LUM or IVA/TEZ). The one month and three month samples were calculated as a percentage of the baseline average. ELISA assays were used to detect IL-18, IL-1β, TNF, IL-6 or IL-10 secretion (n = 13 IVA/LUM; n = 8 IVA/TEZ). [file elife-54556-fig3-data1.xlsx]

## Sheet: IL-18 IVA LUM
PBMC - IVA/LUM
IL-18		Months on IVA/LUM (pg/ml)					Months on IVA/LUM (pg/ml)
	CF Patient Number	0	1	3		CF Patient Number	0	1	3
	CF26	641.976	639.334	142.737		CF26	99.9356	99.5243	22.2197
	CF30	791.431	496.735	194.261		CF30	123.201	77.3262	30.2404
	CF31	495.191	517.011	187.448		CF31	77.0859	80.4826	29.1798
	CF34	331.386	329.415	113.592		CF34	51.5864	51.2796	17.6827
	CF36	400.135	271.806	129.646		CF36	62.2886	42.3117	20.1818
	CF39	785.127	719.999	459.857		CF39	122.22	112.081	71.5854
	CF40	701.466	654.721	304.691		CF40	109.196	101.92	47.4309
	CF51	664.997	544.035	220.394		CF51	103.519	84.6892	34.3085
	CF80	544.589	528.633	239.326		CF80	84.7756	82.2917	37.2556
	CF82	574.759	559.711	288.831		CF82	89.472	87.1295	44.9619
	CF85	764.648	482.413	279.05		CF85	119.032	75.0966	43.4393
	CF10	835.541	515.611	259.048		CF10	130.068	80.2646	40.3256
	CF102	819.818	450.654	394.002		CF102	127.62	70.1527	61.3338
	Average	642.389	516.16	247.145		Average	100	80.35	38.4727
						Zero months set to 100. Each patient calculated relative to the group average.

## Sheet: IL-18 IVA TEZ
PBMC - IVA/TEZ
IL-18		Months on IVA/LUM (pg/ml)					Months on IVA/LUM (pg/ml)
	CF Patient Number	0	1	3		CF Patient Number	0	1	3
	CF34	631.311	568.907	391.373		CF26	87.8443	79.1611	54.4579
	CF53	447.829	285.117	181.264		CF30	62.3136	39.6729	25.2221
	CF100	159.786	57.2822	111.07		CF31	22.2335	7.97058	15.455
	CF38	502.062	327.159	216.206		CF34	69.8599	45.5229	30.0842
	CF23	937.945	432.492	245.657		CF36	130.511	60.1795	34.1822
	CF86	730.149	576.416	325.288		CF39	101.597	80.2059	45.2624
	CF33	931.525	121.059	193.675		CF40	129.618	16.8449	26.9491
	CF64	1408.75	855.586	314.535		CF51	196.022	119.051	43.7663
	Average	718.67	403.002	247.383		Average	100	56.0761	34.4224
						Zero months set to 100. Each patient calculated relative to the group average.

## Sheet: IL-1β IVA LUM
PBMC - IVA/LUM
IL-1β		Months on IVA/LUM (pg/ml)					Months on IVA/LUM (pg/ml)
	CF Patient Number	0	1	3		CF Patient Number	0	1	3
	CF26	1603.29	1421.48	1066.16		CF26	112.75	99.964	74.9769
	CF30	1732.13	1613.31	1605.79		CF30	121.81	113.454	112.925
	CF31	2022.22	1968.31	1961.71		CF31	142.21	138.419	137.955
	CF34	1482.6	2042.96	1903.7		CF34	104.262	143.669	133.876
	CF36	1506.73	1398.07	1244		CF36	105.959	98.3179	87.4831
	CF39	1092.6	1136.38	1516.04		CF39	76.8356	79.915	106.613
	CF40	1539.45	1468.39	1317.34		CF40	108.26	103.263	92.6408
	CF51	1194.57	1466.87	1536.32		CF51	84.0065	103.156	108.04
	CF80	1391.44	950.041	990.578		CF80	97.8513	66.8106	69.6613
	CF82	1234.94	881.069	985.87		CF82	86.8459	61.9602	69.3302
	CF85	1079.58	1054.45	1332.2		CF85	75.9206	74.153	93.6852
	CF10	1256.27	1078.81	888.502		CF10	88.3457	75.866	62.4829
	CF102	1350.07	796.071	1003.54		CF102	94.9422	55.9828	70.5726
	Average	1421.99	1328.94	1334.75		Average	100	93.4562	93.8648
						Zero months set to 100. Each patient calculated relative to the group average.

## Sheet: IL-1β IVA TEZ
PBMC - IVA/TEZ
IL-1β		Months on IVA/LUM (pg/ml)					Months on IVA/LUM (pg/ml)
	CF Patient Number	0	1	3		CF Patient Number	0	1	3
	CF34	1117.49	889.129	200.997		CF26	99.8665	79.4588	17.9625
	CF53	1157.01	763.111	637.867		CF30	103.398	68.1969	57.0043
	CF100	839.393	685.823	508.924		CF31	75.014	61.2899	45.481
	CF38	510.311	748.166	363.495		CF34	45.6049	66.8613	32.4844
	CF23	969.333	1400.61	242.732		CF36	86.6264	125.168	21.6922
	CF86	1521.57	980.051	348.238		CF39	135.978	87.5842	31.121
	CF33	859.738	502.588	71.3204		CF40	76.8322	44.9148	6.37369
	CF64	1977.01	1491.44	653.209		CF51	176.679	133.285	58.3754
	Average	1118.98	932.614	378.348		Average	100	83.3449	33.8118
						Zero months set to 100. Each patient calculated relative to the group average.

## Sheet: TNF IVA LUM
PBMC - IVA/LUM
TNF		Months on IVA/LUM (pg/ml)					Months on IVA/LUM (pg/ml)
	CF Patient Number	0	1	3		CF Patient Number	0	1	3
	CF26	701.764	638.9	347.635		CF26	125.03	113.83	61.9364
	CF30	424.87	328.038	279.229		CF30	75.6972	58.445	49.7489
	CF31	583.207	574.214	377.381		CF31	103.907	102.305	67.2362
	CF34	592.279	600.284	417.067		CF34	105.524	106.95	74.3069
	CF36	427.62	381.13	358.526		CF36	76.1869	67.9042	63.8769
	CF39	583.894	488.397	190.114		CF39	104.03	87.0154	33.8717
	CF40	377.334	365.077	206.255		CF40	67.2279	65.044	36.7475
	CF51	427.126	366.955	226.803		CF51	76.099	65.3786	40.4084
	CF80	863.825	274.726	239.767		CF80	153.904	48.9467	42.7181
	CF82	812.418	545.328	271.305		CF82	144.745	97.1585	48.3371
	CF85	949.94	393.246	266.836		CF85	169.246	70.0628	47.541
	CF10	180.46	162.339	214.978		CF10	32.1518	28.9232	38.3017
	CF102	371.859	180.309	59.4188		CF102	66.2523	32.1248	10.5864
	Average	561.277	407.611	265.793		Average	100	72.6221	47.3552
						Zero months set to 100. Each patient calculated relative to the group average.

## Sheet: TNF IVA TEZ
PBMC - IVA/TEZ
TNF		Months on IVA/LUM (pg/ml)					Months on IVA/LUM (pg/ml)
	CF Patient Number	0	1	3		CF Patient Number	0	1	3
	CF34	195.476	217.507	104.608		CF26	34.4355	38.3165	18.428
	CF53	244.363	201.062	164.375		CF30	43.0475	35.4196	28.9567
	CF100	874.914	665.305	206.809		CF31	154.127	117.202	36.4319
	CF38	790.005	385.189	267.673		CF34	139.169	67.8559	47.1539
	CF23	1255.89	342.605	243.331		CF36	221.24	60.3541	42.8658
	CF86	457.26	491.449	274.5		CF39	80.5521	86.5749	48.3566
	CF33	421.035	413.52	188.23		CF40	74.1706	72.8467	33.1591
	CF64	302.325	122.49	97.1004		CF51	53.2582	21.5782	17.1054
	Average	567.658	354.891	193.328		Average	100	62.5184	34.0572
						Zero months set to 100. Each patient calculated relative to the group average.

## Sheet: IL-6 IVA LUM
PBMC - IVA/LUM
IL-6		Months on IVA/LUM (pg/ml)					Months on IVA/LUM (pg/ml)
	CF Patient Number	0	1	3		CF Patient Number	0	1	3
	CF26	78.6972	76.2403	87.4716		CF26	50.4148	48.8409	56.0358
	CF30	98.5262	106.323	112.483		CF30	63.1176	68.1123	72.0587
	CF31	159.114	136.864	133.147		CF31	101.931	87.6774	85.2964
	CF34	126.315	132.862	132.006		CF34	80.9197	85.1135	84.5652
	CF36	115.794	117.642	117.906		CF36	74.18	75.3635	75.5329
	CF39	222.08	119.761	108.725		CF39	142.268	76.7208	69.6513
	CF40	138.922	128.586	131.017		CF40	88.9957	82.3743	83.9317
	CF51	108.465	99.6921	86.786		CF51	69.4846	63.8645	55.5966
	CF80	96.1057	256.475	272.752		CF80	61.567	164.302	174.729
	CF82	83.9176	92.7843	528.743		CF82	53.7591	59.4392	338.722
	CF85	104.364	160.471	380.529		CF85	66.8575	102.8	243.774
	CF10	457.087	283.463	327.695		CF10	292.818	181.591	209.927
	CF102	239.903	273.845	257.822		CF102	153.686	175.43	165.165
	Average	156.099	152.693	205.93		Average	100	97.8177	131.922
						Zero months set to 100. Each patient calculated relative to the group average.

## Sheet: IL-6 IVA TEZ
PBMC - IVA/TEZ
IL-6		Months on IVA/LUM (pg/ml)					Months on IVA/LUM (pg/ml)
	CF Patient Number	0	1	3		CF Patient Number	0	1	3
	CF34	126.905	66.0928	397.431		CF26	58.5158	30.4754	183.256
	CF53	118.87	226.194	433.966		CF30	54.811	104.298	200.102
	CF100	277.789	382.304	411.159		CF31	128.089	176.281	189.586
	CF38	44.331	37.7217	97.8383		CF34	20.441	17.3935	45.1133
	CF23	218.093	589.142	343.641		CF36	100.563	271.654	158.453
	CF86	196.767	156.276	316.731		CF39	90.7292	72.0591	146.045
	CF33	188.775	168.695	509.886		CF40	87.0443	77.7851	235.109
	CF64	563.449	263.115	107.493		CF51	259.807	121.322	49.565
	Average	216.872	236.192	327.268		Average	100	108.908	150.904
						Zero months set to 100. Each patient calculated relative to the group average.

## Sheet: IL-10 IVA LUM
PBMC - IVA/LUM
IL-10		Months on IVA/LUM (pg/ml)					Months on IVA/LUM (pg/ml)
	CF Patient Number	0	1	3		CF Patient Number	0	1	3
	CF26	0	0	31.8704		CF26	0	0	85.5236
	CF30	41.8174	46.8075	58.829		CF30	112.216	125.607	157.867
	CF31	58.829	66.3753	81.0378		CF31	157.867	178.117	217.464
	CF34	31.8704	38.8287	89.6784		CF34	85.5236	104.196	240.65
	CF36	20.3473	44.9733	47.1736		CF36	54.6017	120.685	126.59
	CF39	34.5472	74.2802	146.47		CF39	92.707	199.33	393.051
	CF40	78.733	85.4265	129.366		CF40	211.279	229.241	347.153
	CF51	43.8739	57.6506	68.7251		CF51	117.735	154.705	184.423
	CF80	37.2946	38.9922	35.8318		CF80	100.08	104.635	96.154
	CF82	33.5226	29.7793	108.457		CF82	89.9574	79.9121	291.042
	CF85	43.3272	17.0926	172.859		CF85	116.268	45.8677	463.865
	CF10	29.1386	95.4133	133.113		CF10	78.1931	256.04	357.207
	CF102	31.1437	49.2418	129.8		CF102	83.5736	132.14	348.316
	Average	37.265	49.6047	94.8625		Average	100	133.113	254.562
						Zero months set to 100. Each patient calculated relative to the group average.

## Sheet: IL-10 IVA TEZ
PBMC - IVA/TEZ
IL-10		Months on IVA/LUM (pg/ml)					Months on IVA/LUM (pg/ml)
	CF Patient Number	0	1	3		CF Patient Number	0	1	3
	CF34					CF26
	CF53	56.5001	191.35	106.142		CF30	120.876	409.374	227.08
	CF100	53.0698	55.1626	213.353		CF31	113.537	118.015	456.447
	CF38	25.5923	15.5567	37.0935		CF34	54.752	33.2819	79.3577
	CF23	48.6655	80.32	25.0544		CF36	104.115	171.836	53.6013
	CF86	71.953	79.3449	118.546		CF39	153.936	169.75	253.616
	CF33	25.9081	119.732	96.3349		CF40	55.4277	256.154	206.099
	CF64	45.5064	110.888	187.507		CF51	97.3563	237.234	401.151
	Average	46.7422	93.1935	112.004		Average	100	199.378	239.622
						Zero months set to 100. Each patient calculated relative to the group average.
